# Supplementary material
Source: publisher figshare collection journal article supplement (https://tandf.figshare.com/ndownloader/files/21126492)
Supplement: Supplementary file 1 [file 21126492]

**The Association between Frailty and Uncorrected Refractive Error in Older Adults**

**Supplementary Table 1:** Participant demographics: NHANES, 1999-2002

|  | **5-Item Frailty** | | | | |
| --- | --- | --- | --- | --- | --- |
|  | | **Total**  n = 2486 | **No Uncorrected Refractive Errora**  n = 2315 (95%) | **Uncorrected Refractive Error**  n = 171 (5%) | **P-value** |
| **Age**, mean (SD) | | 69.8 (7.0) | 69.6 (6.9) | 73.7 (8.8) | **<0.001** |
| **Female**, n (%) | | 1242 (55.4) | 1161 (55.6) | 81 (52.4) | 0.521 |
| **Race**, n (%) | |  |  |  | **<0.001** |
| Non-Hispanic White | | 1448 (82.9) | 1374 (84.0) | 74 (63.6) |  |
| Non-Hispanic Black | | 413 (7.4) | 380 (7.2) | 33 (11.3) |  |
| Mexican American | | 483 (2.6) | 442 (2.6) | 41 (4.1) |  |
| Other Hispanics/other race | | 142 (7.1) | 119 (6.3) | 23 (20.9) |  |
| **Body Mass Index,** n (%), kg/m2 | |  |  |  | 0.059 |
| Underweight (<18.5) | | 37 (1.7) | 32 (1.5) | 5 (4.4) |  |
| Normal (18.5 – 24.9) | | 647 (27.3) | 589 (27.0) | 58 (32.7) |  |
| Overweight (25 – 29.9) | | 958 (37.1) | 892 (37.1) | 66 (37.8) |  |
| Obese (≥30) | | 891 (33.9) | 764 (34.4) | 37 (25.0) |  |
| **Education,** n (%) | |  |  |  | **0.017** |
| < High school | | 997 (29.0) | 908 (28.3) | 89 (41.5) |  |
| High school or equivalent | | 597 (29.7) | 556 (29.7) | 41 (29.9) |  |
| > High school | | 888 (41.3) | 847 (42.0) | 41 (28.6) |  |
| **Marital Status**, n (%) | |  |  |  | **<0.001** |
| Married or cohabitating | | 1492 (65.8) | 1408 (66.6) | 84 (52.2) |  |
| Previously married | | 818 (31.6) | 751 (31.2) | 67 (38.6) |  |
| Never married | | 69 (2.6) | 51 (2.2) | 18 (9.1) |  |
| **Smoking**, n (%) | |  |  |  | 0.316 |
| Never | | 1168 (46.6) | 1079 (46.3) | 89 (51.8) |  |
| Former or Current | | 1316 (53.4) | 1234 (53.7) | 82 (48.2) |  |
| **Diabetes,** n (%) | | 411 (14.5) | 378 (14.3) | 33 (17.9) | 0.336 |
| **Total comorbid conditions**,**b** n (%) | |  |  |  | 0.166 |
| 0 comorbidities | | 513 (20.4) | 478 (20.5) | 35 (18.0) |  |
| 1-2 comorbidities | | 1509 (60.0) | 1408 (60.3) | 101 (54.6) |  |
| >2 comorbidities | | 464 (19.6) | 429 (19.2) | 35 (27.4) |  |

Note. Unweighted n (weighted %).

aNo uncorrected refractive error = presenting visual acuity ≤20/40. Uncorrected refractive error = presenting visual acuity >20/40 correcting to at least 20/40.
bTotal comorbid conditions: angina, arthritis, cancer, congestive heart failure, coronary heart disease, high blood pressure, liver disease, myocardial infarct, stroke

**Supplementary Figure 1.** 4-Item Frailty status by refractive error status: NHANES

Note. Unweighted n, weighted %. Error bars show 95% confidence intervals.

No uncorrected refractive error = presenting visual acuity ≤20/40. Uncorrected refractive error = presenting visual acuity >20/40 correcting to at least 20/40.

*Unadjusted p-value<0.001 for frailty status in no uncorrected refractive error groups vs. uncorrected refractive error group.

**Supplementary Figure 2.** 5-Item Frailty status by refractive error status: NHANES

Note. Unweighted n, weighted %. Error bars show 95% confidence intervals.

No uncorrected refractive error = presenting visual acuity ≤20/40. Uncorrected refractive error = presenting visual acuity >20/40 correcting to at least 20/40.

*Unadjusted p-value<0.001 for frailty status in no uncorrected refractive error groups vs. uncorrected refractive error group.
